# Supplementary material for: Dynamics of artisanal fisheries in two Brazilian Amazonian reserves: implications to co-management
Source: Springer Nature journal article supplement (doi:10.1007/s10750-006-0486-4), 2007-03-19
Supplement: 10750_2006_0486_ESM.pdf [file 10750_2006_0486_ESM.pdf]

Table 1 - Frequency of fishing trips and of fishing gears (number of sampled fish landings) undertake by fishers from the two communities during the two seasons in five habitat categories. The total may be different than the total of fishing lands sampled, because some fishers visited more than one place during a fishing trip.

|                     | Jarauá |     | Ebenezer |     |
|---------------------|--------|-----|----------|-----|
|                     | High   | Low | High     | Low |
| <b>Habitats</b>     |        |     |          |     |
| Lakes               | 130    | 60  | 18       | 10  |
| Rivers              | 12     | 8   | 80       | 9   |
| Channels            | 14     | 0   | 32       | 8   |
| Flooded forest      | 7      | 0   | 39       | 0   |
| Backwaters          | 3      | 37  | 5        | 7   |
| <b>Fishing gear</b> |        |     |          |     |
| Gillnet             | 0      | 31  | 149      | 10  |
| Hand line           | 166    | 0   | 22       | 0   |
| Spear               | 0      | 3   | 2        | 6   |
| Spear + gillnet     | 0      | 67  | 0        | 9   |
| Others <sup>a</sup> | 0      | 3   | 4        | 16  |

<sup>a</sup>It includes trap nets, beach seine, long line and trident

Table 2 – Parameters derived from multiple regression analyses of CPUE in the two seasons, considering all fish species and only the ones with quota

(\*significant at the level of 10%, \*\*significant at the level of 5%).

| Parameter            | High water - general |         | Low water -general |         | High water – quota |         | Low water- quota |         |
|----------------------|----------------------|---------|--------------------|---------|--------------------|---------|------------------|---------|
|                      | Estimate (SE)        | t-ratio | Estimate (SE)      | t-ratio | Estimate (SE)      | t-ratio | Estimate (SE)    | t-ratio |
| Intercept            | 1.12 (0.11)          | 10.39** | 1.99 (0.12)        | 16.69** | 1.19 (0.09)        | 13.89** | 2.95 (0.34)      | 8.75**  |
| Community            | 0.11 (0.07)          | 1.63    | -0.24 (0.11)       | -2.13** | 0.14 (0.05)        | 2.83**  | -0.62 (0.14)     | -4.31** |
| Gear                 |                      |         |                    |         |                    |         |                  |         |
| Spear                |                      |         | -0.29 (0.29)       | -1      | 0.19 (0.15)        | 1.32    | 4.09 (0.52)      | 7.94**  |
| Hand line            | -0.14 (0.13)         | -1.1    |                    |         | -0.09 (0.08)       | -1.12   |                  |         |
| Others               |                      |         | 0.58 (0.35)        | 1.64    |                    |         |                  |         |
| Gillnet              | -0.09 (0.11)         | -0.85   | 0.11 (0.18)        | 0.59    | -0.27 (0.12)       | -2.33** |                  |         |
| Gillnet+Spear        |                      |         | 0.14 (0.21)        | 0.69    |                    |         | -2.02 (0.29)     | -7.00** |
| Environment          |                      |         |                    |         |                    |         |                  |         |
| Lake                 | -0.07 (0.06)         | -1.17   | 0.26 (0.13)        | 1.96    | -0.02 (0.06)       | -0.26   | 0.13 (0.20)      | 0.68    |
| Flooded forest       | -0.16 (0.09)         | -1.86** |                    |         | -0.01 (0.07)       | -0.08   |                  |         |
| Small channels       | -0.08 (0.14)         | -0.56   |                    |         | 0.22 (0.08)        | 2.8**   |                  |         |
| Backwater            | 0.13 (0.14)          | 0.93    | 0.10 (0.14)        | 0.73    | 0.06 (0.15)        | 0.38    | 0.54 (0.21)      | 2.52**  |
| River                |                      |         |                    |         | -0.14 (0.07)       | -2.05** |                  |         |
| <b>r<sup>2</sup></b> | <b>0.13</b>          |         | <b>0.21</b>        |         | <b>0.16</b>        |         | <b>0.55</b>      |         |

**Figure 1**  
[Click here to download high resolution image](#)

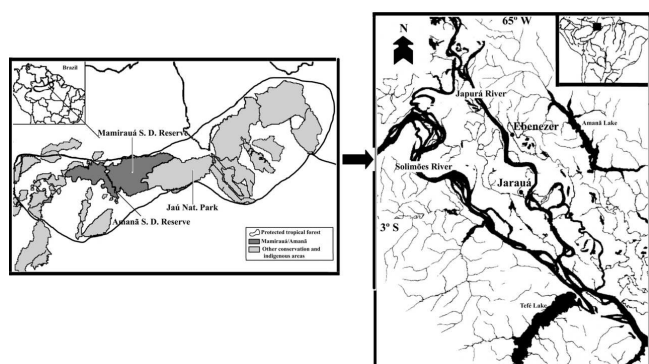

Figure 2a  
[Click here to download high resolution image](#)

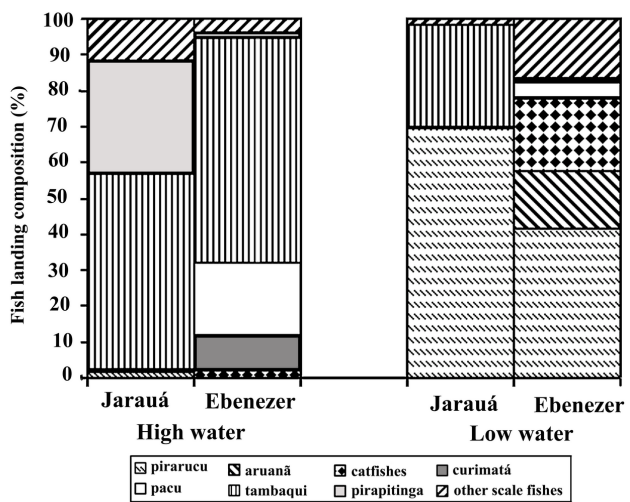

Figure 2b  
[Click here to download high resolution image](#)

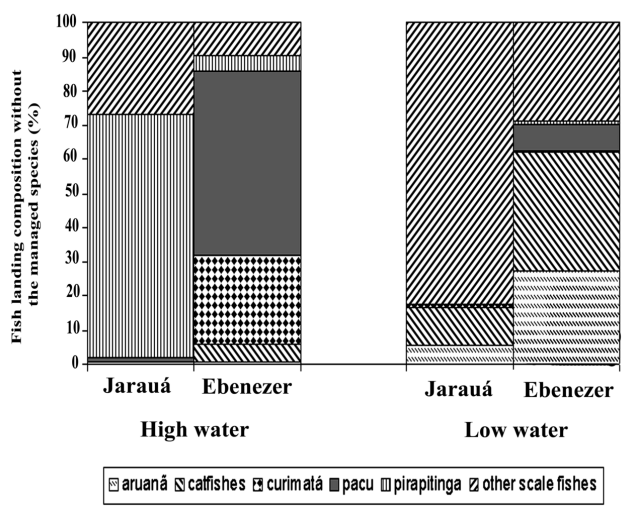

Figure 3

[Click here to download high resolution image](#)

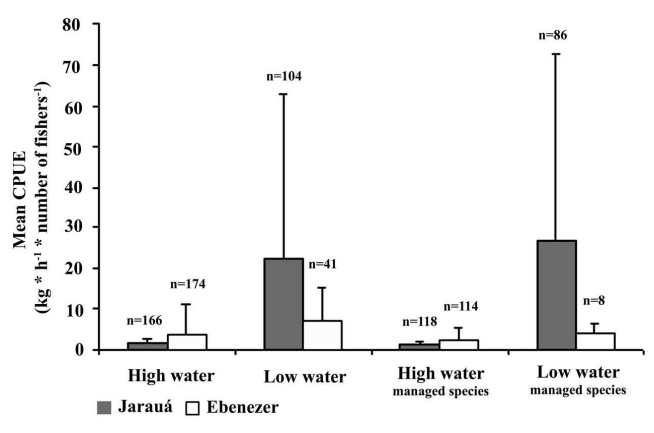

Appendix 1 - Composition in biomass (kg) of fish landings (sorted by fish species or species groups) in Jarauá (Mamirauá Reserve) and Ebenezer (Amanã Reserve). NI = not identified. Identifications are based in our fish collections and in fish species list in Crampton (1999). Fishes are identified at the level of genus or families when the same common name includes several species or when the fish species could not be collected.

| Fish species or species groups                                                | Common Name | Jarauá |       | Ebenezer |      |
|-------------------------------------------------------------------------------|-------------|--------|-------|----------|------|
|                                                                               |             | High   | Low   | High     | Low  |
| <b>Ageneiosidae</b>                                                           |             |        |       |          |      |
| <i>Ageneiosus ucayalensis</i>                                                 | Mandubé     |        |       |          | 7.5  |
| <b>Anostomidae</b>                                                            |             |        |       |          |      |
| <i>Schizodon fasciatus; Leporinus</i> spp                                     | Aracus      | 2.2    | 0.6   | 49.0     | 0.7  |
| <b>Characidae</b>                                                             |             |        |       |          |      |
| <i>Brycon amazonicus; B. melanopterus</i>                                     | Matrinchã   | 1.2    |       | 58.9     |      |
| <i>Triportheus</i> spp.                                                       | Sardinha    |        |       | 0.6      |      |
| <b>Cichlidae</b>                                                              |             |        |       |          |      |
| <i>Chaetobranchius</i> spp; <i>Satanoperca jurupari; Acarichthys heckelii</i> | Cará        |        | 3.9   |          | 26.4 |
| <i>Astronotus crassipinnis</i>                                                | Acará Açú   | 11.2   | 4.0   |          | 0.5  |
| <i>Cichla monoculus</i>                                                       | Tucunaré    |        | 213.7 | 1.0      | 58.8 |
| <i>Heros</i> spp.                                                             | Acará Roxo  |        |       |          | 0.2  |
| <b>Clupeidae</b>                                                              |             |        |       |          |      |
| <i>Pellona castelnaeana</i>                                                   | Sardinhão   |        |       | 1.6      |      |
| <b>Curimatidae</b>                                                            |             |        |       |          |      |
| <i>Potamorhina</i> spp.                                                       | Branquinha  |        | 53.4  |          |      |
| <i>Psectrogaster</i> spp.                                                     | Cascudinha  |        |       |          | 2.0  |
| <b>Cynodontidae</b>                                                           |             |        |       |          |      |
| <i>Acestrorhynchus</i> spp., <i>Rhaphiodon vulpinus</i> ,                     | Cachorro    |        |       | 0.9      |      |

**Doradidae**

|    |       |  |  |      |
|----|-------|--|--|------|
| NI | Bacus |  |  | 13.0 |
|----|-------|--|--|------|

**Erythrinidae**

|                            |        |  |     |     |     |
|----------------------------|--------|--|-----|-----|-----|
| <i>Hoplias malabaricus</i> | Traíra |  | 2.8 | 0.7 | 1.0 |
|----------------------------|--------|--|-----|-----|-----|

|                                     |      |     |     |  |  |
|-------------------------------------|------|-----|-----|--|--|
| <i>Hoploerythrinus unitaeniatus</i> | Jeju | 1.5 | 8.0 |  |  |
|-------------------------------------|------|-----|-----|--|--|

**Hemiodontidae**

|                    |         |  |  |     |  |
|--------------------|---------|--|--|-----|--|
| <i>Anodus</i> spp. | Charuto |  |  | 6.6 |  |
|--------------------|---------|--|--|-----|--|

|                      |      |  |     |  |      |
|----------------------|------|--|-----|--|------|
| <i>Hemiodus</i> spp. | Cuiú |  | 3.2 |  | 66.4 |
|----------------------|------|--|-----|--|------|

**Loricariidae**

|                            |       |  |     |     |      |
|----------------------------|-------|--|-----|-----|------|
| <i>Liposarcus pardalis</i> | Bodós |  | 1.0 | 5.3 | 22.4 |
|----------------------------|-------|--|-----|-----|------|

**Osteoglossidae**

|                       |          |      |         |  |       |
|-----------------------|----------|------|---------|--|-------|
| <i>Arapaima gigas</i> | Pirarucu | 41.5 | 11928.0 |  | 969.0 |
|-----------------------|----------|------|---------|--|-------|

|                                 |                   |     |      |     |       |
|---------------------------------|-------------------|-----|------|-----|-------|
| <i>Osteoglossum bicirrhosum</i> | Sulamba or Aruanã | 5.0 | 19.4 | 3.8 | 374.8 |
|---------------------------------|-------------------|-----|------|-----|-------|

**Pimelodidae**

|    |               |  |  |  |     |
|----|---------------|--|--|--|-----|
| NI | Barba de Pena |  |  |  | 5.2 |
|----|---------------|--|--|--|-----|

|    |           |  |  |  |     |
|----|-----------|--|--|--|-----|
| NI | Galeneoga |  |  |  | 8.0 |
|----|-----------|--|--|--|-----|

|    |        |  |  |  |     |
|----|--------|--|--|--|-----|
| NI | Melado |  |  |  | 1.9 |
|----|--------|--|--|--|-----|

|                              |         |  |  |     |  |
|------------------------------|---------|--|--|-----|--|
| <i>Brachyplatystoma</i> spp. | Dourado |  |  | 4.0 |  |
|------------------------------|---------|--|--|-----|--|

|                              |            |  |  |     |  |
|------------------------------|------------|--|--|-----|--|
| <i>Brachyplatystoma</i> spp. | Piramutaba |  |  | 3.0 |  |
|------------------------------|------------|--|--|-----|--|

|                                      |         |  |      |  |  |
|--------------------------------------|---------|--|------|--|--|
| <i>Brachyplatystoma filamentosum</i> | Filhote |  | 23.5 |  |  |
|--------------------------------------|---------|--|------|--|--|

|                               |             |  |  |  |       |
|-------------------------------|-------------|--|--|--|-------|
| <i>Calophysus macropterus</i> | Piracatinga |  |  |  | 195.0 |
|-------------------------------|-------------|--|--|--|-------|

|                      |        |  |     |  |     |
|----------------------|--------|--|-----|--|-----|
| <i>Leiarius</i> spp. | Jundiá |  | 1.8 |  | 4.7 |
|----------------------|--------|--|-----|--|-----|

|                          |     |  |     |  |     |
|--------------------------|-----|--|-----|--|-----|
| <i>Paulicea luetkeni</i> | Jaú |  | 2.0 |  | 1.0 |
|--------------------------|-----|--|-----|--|-----|

|                                      |          |  |      |      |     |
|--------------------------------------|----------|--|------|------|-----|
| <i>Phractocephalus hemiliopterus</i> | Pirarara |  | 17.0 | 21.0 | 5.0 |
|--------------------------------------|----------|--|------|------|-----|

|                             |             |  |  |  |      |
|-----------------------------|-------------|--|--|--|------|
| <i>Pinirampus pirinampu</i> | Barba Chata |  |  |  | 23.6 |
|-----------------------------|-------------|--|--|--|------|

|                                  |          |  |     |     |      |
|----------------------------------|----------|--|-----|-----|------|
| <i>Pseudoplatystoma tigrinum</i> | Caparari |  | 0.1 | 9.5 | 56.2 |
|----------------------------------|----------|--|-----|-----|------|

|                              |          |  |  |      |       |
|------------------------------|----------|--|--|------|-------|
| <i>Pseudoplatystoma</i> spp. | Surubins |  |  | 45.5 | 168.8 |
|------------------------------|----------|--|--|------|-------|



**Prochilodontidae**

|                              |          |     |       |       |
|------------------------------|----------|-----|-------|-------|
| <i>Prochilodus nigricans</i> | Curimatá | 1.9 | 393.3 | 6.4   |
| <i>Semaprochilodus</i> spp.  | Jaraquis |     | 11.8  | 206.0 |

**Sciaenidae**

|                         |         |  |  |     |
|-------------------------|---------|--|--|-----|
| <i>Plagioscion</i> spp. | Pescada |  |  | 2.2 |
|-------------------------|---------|--|--|-----|

**Serrasalminidae**

|                                           |             |        |        |        |       |
|-------------------------------------------|-------------|--------|--------|--------|-------|
| <i>Mylossoma</i> spp.; <i>Myleus</i> spp. | Pacu        | 13.0   | 0.2    | 827.0  | 105.6 |
| <i>Colossoma macroporum</i>               | Tambaqui    | 1242.4 | 4849.8 | 2545.9 |       |
| <i>Piaractus brachypomus</i>              | Pirapitinga | 729.7  | 0.6    | 67.1   | 12.5  |
| <i>Serrasalmus</i> spp.                   |             |        |        |        |       |
| <i>Pygocentrus nattereri</i>              | Piranhas    | 255.1  | 3.9    | 2.9    | 0.2   |

|              |  |               |                |               |               |
|--------------|--|---------------|----------------|---------------|---------------|
| <b>Total</b> |  | <b>2302.8</b> | <b>17135.0</b> | <b>4076.2</b> | <b>2332.0</b> |
|--------------|--|---------------|----------------|---------------|---------------|

---
